# Supplementary material for: PTEN regulates adipose progenitor cell growth, differentiation, and replicative aging
Source: PubMed Central journal article supplement (PMC8350019; doi:10.1016/j.jbc.2021.100968), 2021-07-14
Supplement: mmc1.pdf [file mmc1.pdf]

# Supporting information

## Supporting information figures:

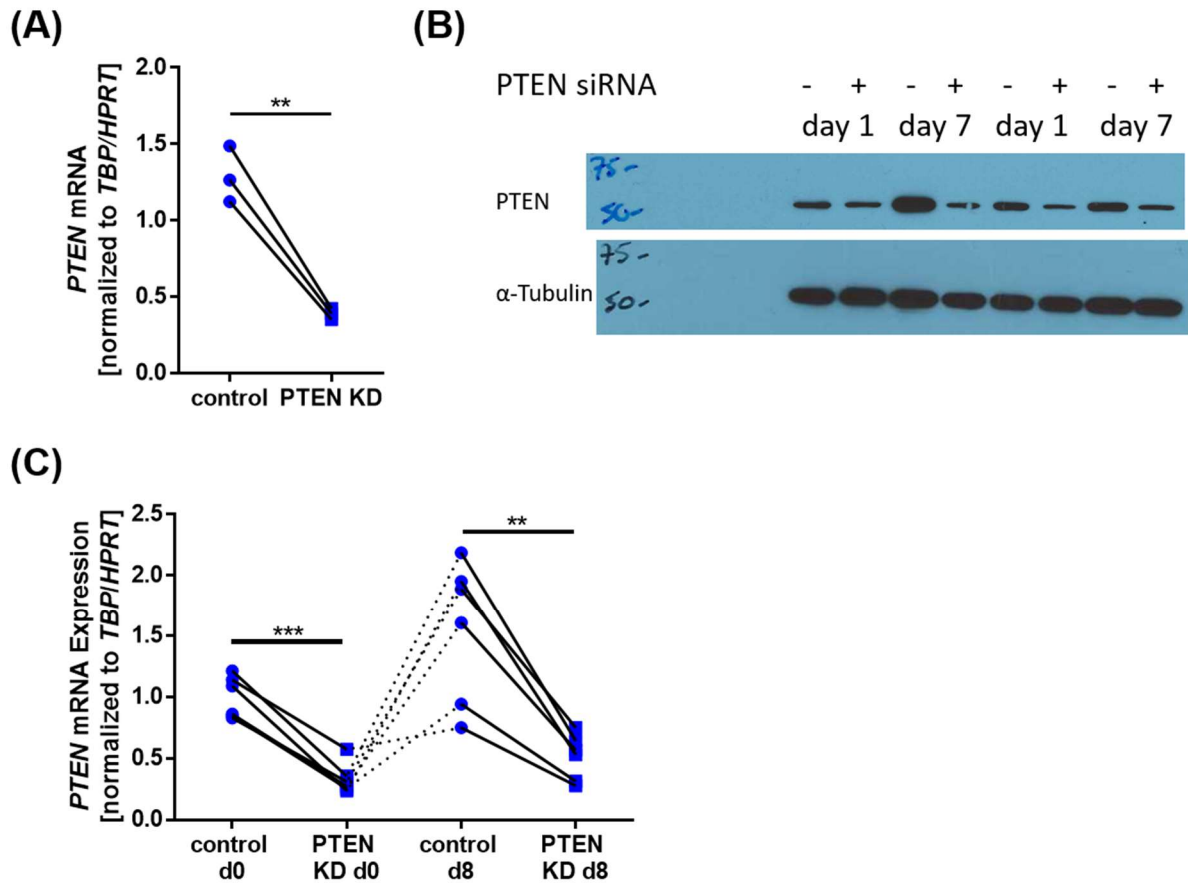

**Figure S1:** PTEN expression was reduced in control and PTEN KD SVF cells. (A) PTEN mRNA expression in subcutaneous PTEN KD SVF cells was downregulated  $0.3 \pm 0.01$  fold ( $n=3$ ,  $p=0.009$ ) compared to controls. (B) Western blots of visceral PTEN KD/control SVF cells: PTEN knockdown was stable for 7 days after siRNA transfection. (C) *PTEN* mRNA expression in visceral PTEN KD/ SVF cells was downregulated upon induction of differentiation (d0, one day after transfection) and after eight days of adipose differentiation (d8) compared to controls. Lines between individual data points indicate matched data from single experiments (control vs. respective knockdown). p-values were determined via paired t-test (\*\*  $p < 0.001$  \*\*\*  $p < 0.001$ ).

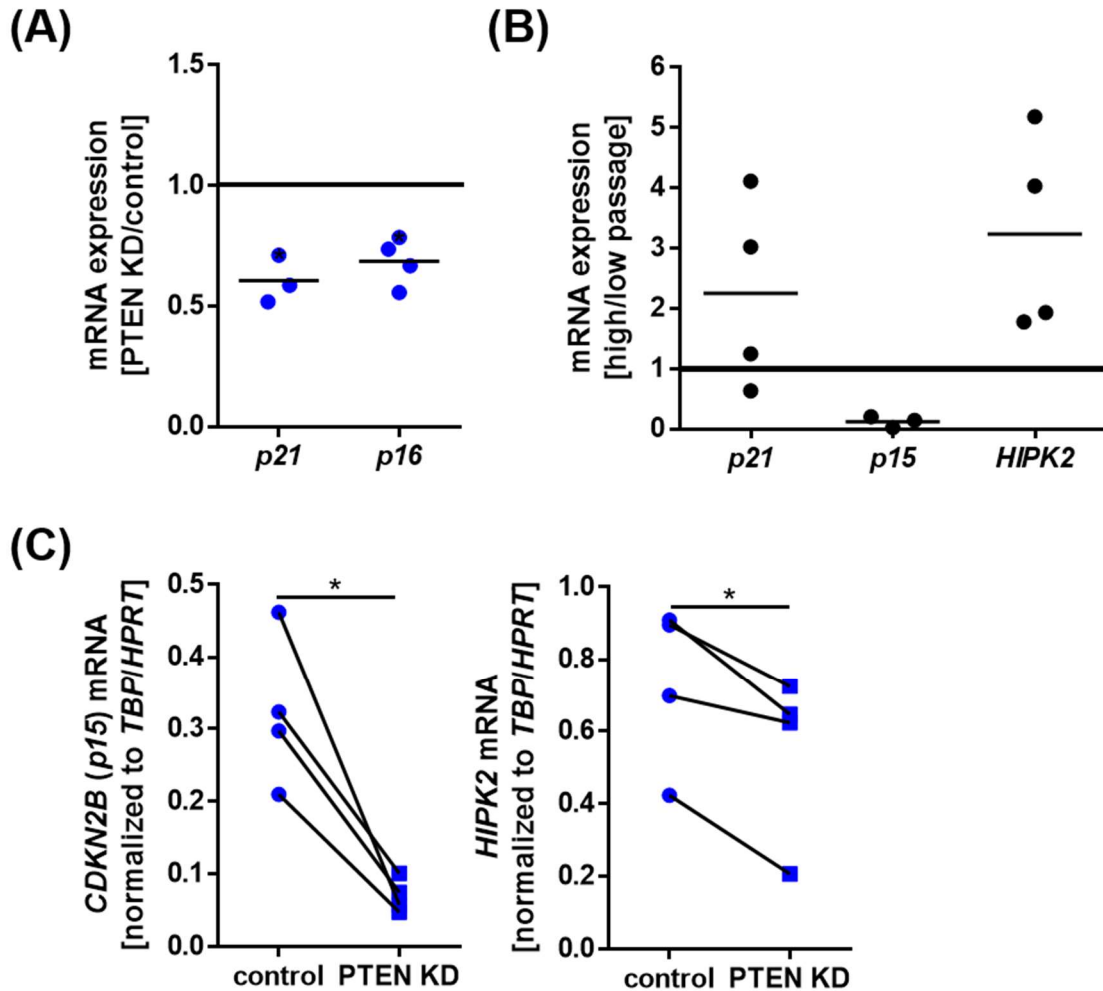

**Figure S2:** mRNA expression of senescence marker was reduced after PTEN KD. (A) Senescence marker qPCRs of PTEN KD/control visceral SVF cells: On the mRNA level we found a reduction of *CDKN1A* (*p21*) (to  $0.6 \pm 0.06$  fold,  $n=3$ ,  $p=0.031$ ) and senescence marker *CDKN2A* (*p16*) (to  $0.68 \pm 0.05$  fold,  $n=4$ ,  $p=0.014$ ). (B) Senescence marker qPCRs comparing low passage vs. high passage LipPD1 cells: On the mRNA level we found *p21* elevated  $2.3 \pm 0.8$  fold, ( $n=4$ ,  $p=0.27$ ), *CDKN2B* (*p15*) reduced to  $0.02 \pm 0.05$  fold ( $n=3$ ,  $p=0.07$ ) and *HIPK2* elevated  $3.2 \pm 0.8$  fold ( $n=4$ ,  $p=0.028$ ). (C) qPCRs to confirm results from RNA-sequencing: *p15* (to  $0.23 \pm 0.04$  fold,  $n=4$ ,  $p=0.017$ ) and *HIPK2* (to  $0.73 \pm 0.09$  fold,  $n=4$ ,  $p=0.02$ ) were downregulated after PTEN KD in visceral SVF cells. Lines between individual data points indicate matched data from single experiments (control vs. respective knockdown). p-values for (A) and (B) were determined via one-sample t-test of the log(fold change), p-values for (C) were determined via paired t-test.

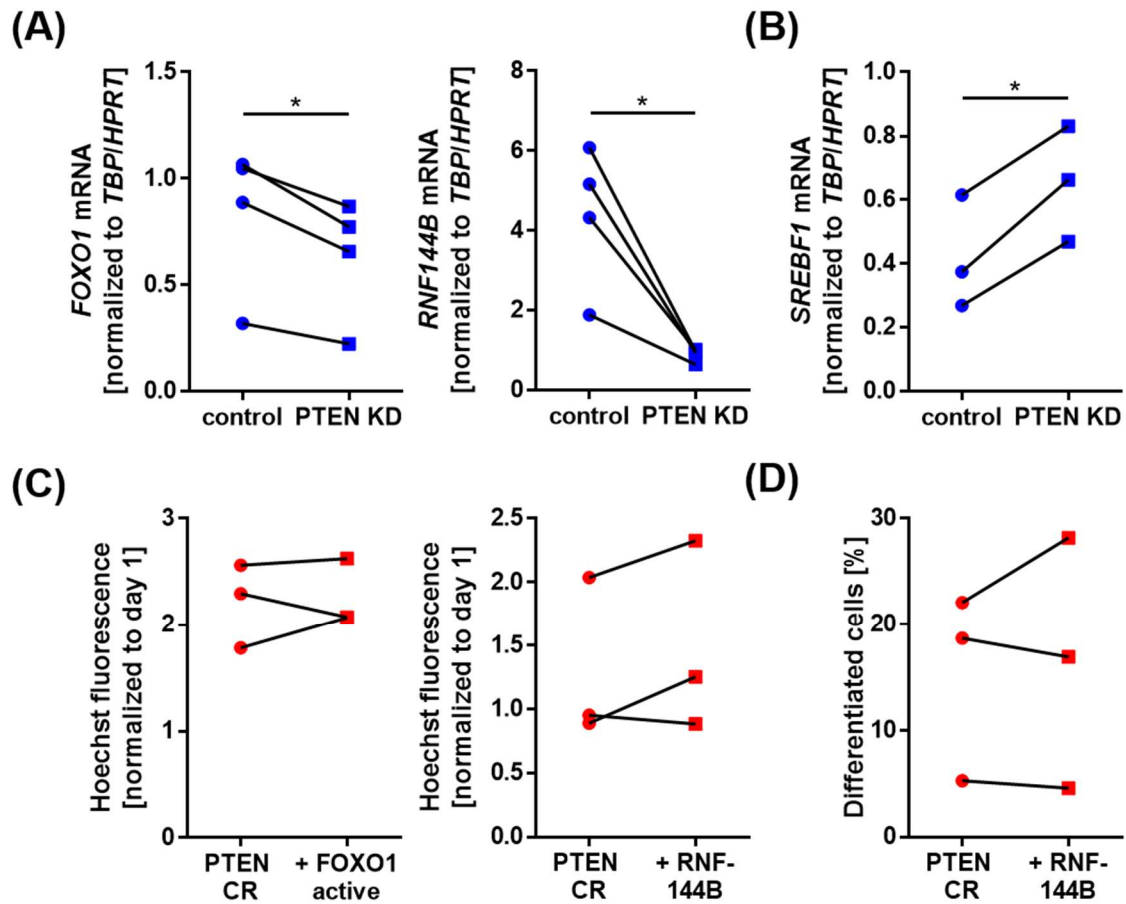

**Figure S3:** FOXO1 and RNF144B are downregulated in PTEN KD cells. (A) qPCRs to confirm results from RNA-sequencing: *FOXO1* (to  $0.75 \pm 0.03$  fold,  $n=4$ ,  $p=0.018$ ) and *RNF144B* (to  $0.23 \pm 0.04$  fold,  $n=4$ ,  $p=0.025$ ) were downregulated after PTEN KD in visceral SVF cells. (B) *SREBF1* was upregulated on the mRNA level ( $1.6 \pm 0.1$  fold,  $n=3$ ,  $p=0.013$ ) in visceral PTEN KD cells. (C) Neither overexpression of constitutively active FOXO1 nor RNF144B in PTEN CR cells had effects on proliferation (as determined via Hoechst assay 7 days post transfection normalized to day 1 after transfection). (D) RNF144B overexpression had no influence on adipogenesis of PTEN CR cells. Lines between individual data points indicate matched data from single experiments (control vs. respective knockdown or overexpression). p-values were determined via paired t-test.

**PTEN/ $\alpha$ -Tubulin**

| Lane | cell strain | passage | generation | siRNA   | $\alpha$ -Tubulin | PTEN    | PTEN/Tubulin | Fold  |
|------|-------------|---------|------------|---------|-------------------|---------|--------------|-------|
| 1    | SVF#10      | 15      | 17.5       | control | 29685.8           | 30858.8 | 1.0395       | 1     |
| 2    | SVF#10      | 15      | 17.5       | PTEN    | 25892.3           | 6868.3  | 0.2653       | 0.255 |
| 3    | SVF#10      | 19      | 20.5       | control | 26662.7           | 25792.9 | 0.9674       | 1     |
| 4    | SVF#10      | 19      | 20.5       | PTEN    | 25048.1           | 14121.5 | 0.5638       | 0.583 |
| 5    | SVF#10      | 21      | 21.5       | control | 21221.5           | 16851.7 | 0.7941       | 1     |
| 6    | SVF#10      | 21      | 21.5       | PTEN    | 24097.4           | 1199.8  | 0.0498       | 0.063 |

**Gel 2**

| Lane | cell strain | passage | generation | siRNA   | $\alpha$ -Tubulin | PTEN    | PTEN/Tubulin | Fold  |
|------|-------------|---------|------------|---------|-------------------|---------|--------------|-------|
| 1    | SVF#6       | 20      | 19.5       | control | 28432.6           | 34222.4 | 1.2036       | 1     |
| 2    | SVF#6       | 20      | 19.5       | PTEN    | 28163.5           | 13651.6 | 0.4847       | 0.403 |
| 3    | SVF#6       | 23      | 25         | control | 28809.4           | 23717.6 | 0.8233       | 1     |
| 4    | SVF#6       | 23      | 25         | PTEN    | 26735.5           | 13076.3 | 0.4891       | 0.594 |
| 5    | SVF#6       | 13      | 15         | control | 32007.1           | 36336.6 | 1.1353       | 1     |
| 6    | SVF#6       | 13      | 15         | PTEN    | 27552.4           | 13760.5 | 0.4994       | 0.44  |

**Gel 3**

| Lane | cell strain | passage | generation | siRNA   | $\alpha$ -Tubulin | PTEN    | PTEN/Tubulin | Fold  |
|------|-------------|---------|------------|---------|-------------------|---------|--------------|-------|
| 1    | SVF#9       | 12      | 14.5       | control | 26326.2           | 34254.7 | 1.3012       | 1     |
| 2    | SVF#9       | 12      | 14.5       | PTEN    | 23683.8           | 18228.0 | 0.7696       | 0.592 |
| 3    | SVF#9       | 16      | 19.5       | control | 26977.9           | 38985.1 | 1.4451       | 1     |
| 4    | SVF#9       | 16      | 19.5       | PTEN    | 23271.4           | 4514.9  | 0.1940       | 0.134 |
| 5    | SVF#9       | 19      | 23         | control | 22783.1           | 25602.5 | 1.1237       | 1     |
| 6    | SVF#9       | 19      | 23         | PTEN    | 25241.9           | 6661.7  | 0.2639       | 0.235 |

**Gel 4**

| Lane | cell strain | passage | generation | siRNA   | $\alpha$ -Tubulin | PTEN    | PTEN/Tubulin | Fold  |
|------|-------------|---------|------------|---------|-------------------|---------|--------------|-------|
| 1    | SVF#10      | 18      | 27         | control | 25150.6           | 20024.3 | 0.7962       | 1     |
| 2    | SVF#10      | 18      | 27         | PTEN    | 29801.7           | 17714.1 | 0.5944       | 0.747 |
| 3    | SVF#9       | 25      | 29.5       | control | 28390.2           | 24607.5 | 0.8668       | 1     |
| 4    | SVF#9       | 25      | 29.5       | PTEN    | 31141.2           | 14283.6 | 0.4587       | 0.529 |
| 5    | SVF#10      | 16      | 24.5       | control | 42170.0           | 53220.4 | 1.2620       | 1     |
| 6    | SVF#10      | 16      | 24.5       | PTEN    | 49634.0           | 41527.7 | 0.8367       | 0.663 |
| 7    | SVF#10      | 19      | 28         | control | 36816.0           | 36749.9 | 0.9982       | 1     |
| 8    | SVF#10      | 19      | 28         | PTEN    | 33632.1           | 18851.5 | 0.5605       | 0.562 |

**Gel 5**

| Lane | cell strain | passage | generation | siRNA   | $\alpha$ -Tubulin | PTEN    | PTEN/Tubulin | Fold  |
|------|-------------|---------|------------|---------|-------------------|---------|--------------|-------|
| 1    | SVF#10      | 22      | 31.5       | control | 25567.1           | 26098.5 | 1.0173       | 1     |
| 2    | SVF#10      | 22      | 31.5       | PTEN    | 22026.5           | 14362.9 | 0.6521       | 0.641 |
| 3    | SVF#8       | 6       | 11.5       | control | 23997.8           | 27608.4 | 1.1505       | 1     |
| 4    | SVF#8       | 6       | 11.5       | PTEN    | 22733.3           | 20224.4 | 0.8896       | 0.773 |
| 5    | SVF#6       | 19      | 27.5       | control | 25528.2           | 28333.1 | 1.1100       | 1     |
| 6    | SVF#6       | 19      | 27.5       | PTEN    | 22236.8           | 14500.3 | 0.6492       | 0.585 |
| 7    | SVF#6       | 10      | 16.5       | control | 32681.5           | 48733.2 | 1.4912       | 1     |
| 8    | SVF#6       | 10      | 16.5       | PTEN    | 31490.7           | 31924.4 | 1.0138       | 0.68  |
| 9    | SVF#6       | 14      | 21         | control | 23236.8           | 21936.5 | 0.9404       | 1     |
| 10   | SVF#6       | 14      | 21         | PTEN    | 27925.7           | 10446.5 | 0.3741       | 0.388 |

**pAKT/AKT**

| Lane | cell strain | passage | generation | siRNA   | pAKT      | AKT     | pAKT/AKT | Fold  |
|------|-------------|---------|------------|---------|-----------|---------|----------|-------|
| 1    | SVF#10      | 22      | 31.5       | control | 8394.953  | 24410.3 | 0.3439   | 1     |
| 2    | SVF#10      | 22      | 31.5       | PTEN    | 22735.38  | 28621.7 | 0.7943   | 2.31  |
| 3    | SVF#8       | 6       | 11.5       | control | 412.92    | 27179.5 | 0.0152   | 1     |
| 4    | SVF#8       | 6       | 11.5       | PTEN    | 915.749   | 26966.7 | 0.0340   | 2.235 |
| 5    | SVF#6       | 19      | 27.5       | control | 126.95    | 27440.6 | 0.0050   | 1     |
| 6    | SVF#6       | 19      | 27.5       | PTEN    | 433.263   | 26802   | 0.0150   | 3.015 |
| 7    | SVF#6       | 10      | 16.5       | control | 896.477   | 45455.4 | 0.0197   | 1     |
| 8    | SVF#6       | 10      | 16.5       | PTEN    | 37526.342 | 50902.8 | 0.7372   | 37.38 |
| 9    | SVF#6       | 14      | 21         | control | 25207.38  | 40361.9 | 0.6245   | 1     |
| 10   | SVF#6       | 14      | 21         | PTEN    | 33553.664 | 34367.8 | 0.9763   | 1.563 |

**Gel 2**

| Lane | cell strain | passage | generation | siRNA   | AKT       | pAKT    | pAKT/AKT | Fold  |
|------|-------------|---------|------------|---------|-----------|---------|----------|-------|
| 1    | SVF#10      | 18      | 27         | control | 25284.451 |         |          |       |
| 2    | SVF#10      | 18      | 27         | PTEN    | 31423.43  |         |          |       |
| 3    | SVF#9       | 25      | 29.5       | control | 20953.945 |         |          |       |
| 4    | SVF#9       | 25      | 29.5       | PTEN    | 24168.702 |         |          |       |
| 5    | SVF#10      | 16      | 24.5       | control | 36576.794 | 191.192 | 0.0052   | 1     |
| 6    | SVF#10      | 16      | 24.5       | PTEN    | 44530.957 | 23790   | 0.5342   | 102.2 |
| 7    | SVF#10      | 19      | 28         | control | 39983.886 | 28464.9 | 0.7119   | 1     |
| 8    | SVF#10      | 19      | 28         | PTEN    | 19359.48  | 37363.3 | 1.9300   | 2.711 |

**pS6/ $\alpha$ -Tubulin**

| Lane | cell strain | passage | generation | siRNA   | $\alpha$ -Tubulin | pS6     | pS6/Tubulin | Fold  |
|------|-------------|---------|------------|---------|-------------------|---------|-------------|-------|
| 1    | SVF#10      | 15      | 17.5       | control | 29685.765         | 1591.79 | 0.0536      | 1     |
| 2    | SVF#10      | 15      | 17.5       | PTEN    | 25892.258         | 14296.5 | 0.5522      | 10.3  |
| 3    | SVF#10      | 19      | 20.5       | control | 26662.673         | 6980.95 | 0.2618      | 1     |
| 4    | SVF#10      | 19      | 20.5       | PTEN    | 25048.116         | 37874.3 | 1.0693      | 4.084 |
| 5    | SVF#10      | 21      | 21.5       | control | 21221.459         | 985.891 | 0.0465      | 1     |
| 6    | SVF#10      | 21      | 21.5       | PTEN    | 24097.409         | 15372.4 | 0.6379      | 13.73 |

**Gel 2**

| Lane | cell strain | passage | generation | siRNA   | $\alpha$ -Tubulin | pS6     | pS6/Tubulin | Fold  |
|------|-------------|---------|------------|---------|-------------------|---------|-------------|-------|
| 1    | SVF#10      | 22      | 31.5       | control | 25567.078         | 64222.7 | 2.5119      | 1     |
| 2    | SVF#10      | 22      | 31.5       | PTEN    | 22026.501         | 73514.5 | 3.3375      | 1.329 |
| 3    | SVF#8       | 6       | 11.5       | control | 23997.794         | 2306.21 | 0.0961      | 1     |
| 4    | SVF#8       | 6       | 11.5       | PTEN    | 22733.258         | 6170.49 | 0.2714      | 2.824 |
| 5    | SVF#6       | 19      | 27.5       | control | 25528.208         |         |             |       |
| 6    | SVF#6       | 19      | 27.5       | PTEN    | 22236.773         |         |             |       |
| 7    | SVF#6       | 10      | 16.5       | control | 32681.501         | 1563.01 | 0.0478      | 1     |
| 8    | SVF#6       | 10      | 16.5       | PTEN    | 31490.723         | 5657.71 | 0.1797      | 3.757 |
| 9    | SVF#6       | 14      | 21         | control | 23236.752         | 239.192 | 0.0103      | 1     |
| 10   | SVF#6       | 14      | 21         | PTEN    | 27925.693         | 15612.9 | 0.5591      | 54.52 |

**Gel 3**

| Lane | cell strain | passage | generation | siRNA   | $\alpha$ -Tubulin | pS6     | pS6/Tubulin | Fold  |
|------|-------------|---------|------------|---------|-------------------|---------|-------------|-------|
| 1    | SVF#10      | 18      | 27         | control | 25150.572         | 471.556 | 0.0187      | 1     |
| 2    | SVF#10      | 18      | 27         | PTEN    | 29801.744         | 24020.1 | 0.8060      | 42.99 |
| 3    | SVF#9       | 25      | 29.5       | control | 28390.179         | 421.435 | 0.0148      | 1     |
| 4    | SVF#9       | 25      | 29.5       | PTEN    | 31141.229         | 2097.5  | 0.0674      | 4.537 |
| 5    | SVF#10      | 16      | 24.5       | control | 42169.971         | 6913.85 | 0.1402      | 1     |
| 6    | SVF#10      | 16      | 24.5       | PTEN    | 49634.049         | 29104.5 | 0.5864      | 4.181 |
| 7    | SVF#10      | 19      | 28         | control | 36816.007         | 41326.6 | 1.1225      | 1     |
| 8    | SVF#10      | 19      | 28         | PTEN    | 33632.057         | 40305.2 | 1.1984      | 1.068 |

**pFOXO1/ $\alpha$ -Tubulin**

| Lane | cell strain | passage | generation | siRNA   | $\alpha$ -Tubulin | pFOXO1  | pFOXO1/Tubulin | Fold  |
|------|-------------|---------|------------|---------|-------------------|---------|----------------|-------|
| 1    | SVF#6       | 23      | 25         | control | 23465.723         | 1664.86 | 0.0709         | 1     |
| 2    | SVF#6       | 23      | 25         | PTEN    | 25824.551         | 9051.15 | 0.3505         | 4.94  |
| 3    | SVF#9       | 16      | 19.5       | control | 19014.723         | 5445.25 | 0.2864         | 1     |
| 4    | SVF#9       | 16      | 19.5       | PTEN    | 21137.915         | 9373.2  | 0.4434         | 1.548 |
| 5    | SVF#10      | 19      | 28         | control | 18774.551         | 219.778 | 0.0117         | 1     |
| 6    | SVF#10      | 19      | 28         | PTEN    | 18489.844         | 2879.62 | 0.1557         | 13.3  |

**SREBP1/ $\alpha$ -Tubulin**

| Lane | cell strain | passage | generation | siRNA   | $\alpha$ -Tubulin | SREBP1  | SREBP1/Tubulin | Fold  |
|------|-------------|---------|------------|---------|-------------------|---------|----------------|-------|
| 1    | SVF#10      | 19      | 20.5       | control | 6903.933          | 9476.12 | 1.3726         | 1     |
| 2    | SVF#10      | 19      | 20.5       | PTEN    | 8575.296          | 19465.1 | 2.2699         | 1.654 |
| 3    | SVF#6       | 20      | 19.5       | control | 5463.04           | 6880.17 | 1.2593         | 1     |
| 4    | SVF#6       | 20      | 19.5       | PTEN    | 5284.004          | 11169.2 | 2.1138         | 1.679 |
| 5    | SVF#9       | 12      | 14.5       | control | 3411.983          | 6350.1  | 1.8611         | 1     |
| 6    | SVF#9       | 12      | 14.5       | PTEN    | 2969.569          | 6134.44 | 2.0658         | 1.11  |
| 7    | SVF#8       | 13      | 22.5       | control | 4734.225          | 3256.18 | 0.6878         | 1     |
| 8    | SVF#8       | 13      | 22.5       | PTEN    | 5846.175          | 6014.9  | 1.0289         | 1.496 |

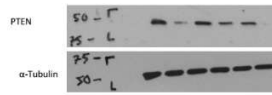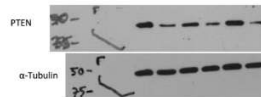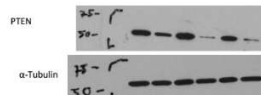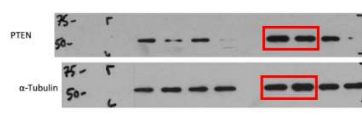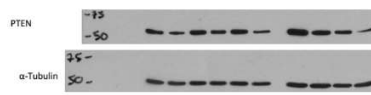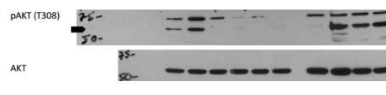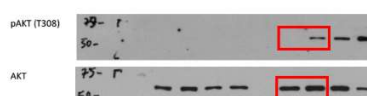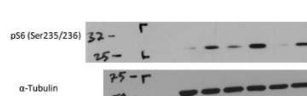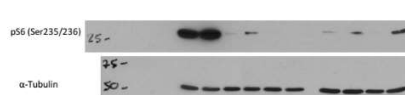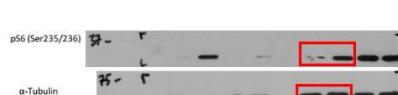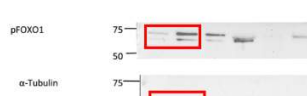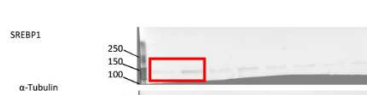

**Figure S4:** Western blots of PTEN KD/control SVF cells: exposed films and densitometric analyses of PTEN (normalized to  $\alpha$ -Tubulin), pAKT (T308) (normalized to total AKT), pS6 (Ser235/236) (normalized to  $\alpha$ -Tubulin), NAMPT (normalized to  $\alpha$ -Tubulin), p21 (normalized to  $\alpha$ -Tubulin), pFOXO1 (normalized to  $\alpha$ -Tubulin) and SREBP1 (normalized to  $\alpha$ -Tubulin). Western blot images presented in Figures 1(a) and 6(b) were reused (indicated with red boxes).

## PTEN CRISPR SVF

### PTEN/ $\alpha$ -Tubulin

| Gel 1 |              |           |                   |         |              |        |
|-------|--------------|-----------|-------------------|---------|--------------|--------|
| Lane  | Cells        | guideRNA  | $\alpha$ -Tubulin | PTEN    | PTEN/Tubulin | Fold   |
| 1     | CRISPR SVF#1 | control   | 44983.5           | 35283.2 | 0.7844       | 1      |
| 2     | CRISPR SVF#1 | PTEN #3+4 | 41204.8           | 23047.4 | 0.5593       | 0.7131 |
| 3     | CRISPR SVF#3 | control   | 39369.1           | 34844.8 | 0.8851       | 1      |
| 4     | CRISPR SVF#3 | PTEN #3+4 | 32432.8           | 2196.4  | 0.0677       | 0.0765 |

  

| Gel 2 |              |           |                   |         |              |        |
|-------|--------------|-----------|-------------------|---------|--------------|--------|
| Lane  | Cells        | guideRNA  | $\alpha$ -Tubulin | PTEN    | PTEN/Tubulin | Fold   |
| 1     | CRISPR SVF#9 | control   | 30284.5           | 37275.7 | 1.2309       | 1      |
| 2     | CRISPR SVF#9 | PTEN #3+4 | 25771.4           | 40277.4 | 1.5629       | 1.2697 |

  

| Gel 3 |              |           |         |         |            |        |
|-------|--------------|-----------|---------|---------|------------|--------|
| Lane  | Cells        | guideRNA  | GAPDH   | PTEN    | PTEN/GAPDH | Fold   |
| 1     | CRISPR SVF#6 | control   | 46613.2 | 25935.4 | 0.5564     | 1      |
| 2     | CRISPR SVF#6 | control   | 37796.5 | 20527.1 | 0.5431     | 0.9761 |
| 3     | CRISPR SVF#6 | PTEN #3   | 48217.2 | 22996.5 | 0.4769     | 0.8572 |
| 4     | CRISPR SVF#6 | PTEN #3+4 | 50484.9 | 16209.0 | 0.3211     | 0.5770 |

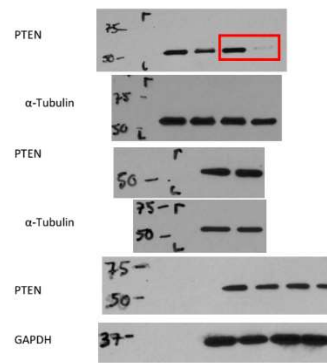

### pAKT/AKT

| Gel 1 |              |           |           |           |             |             |
|-------|--------------|-----------|-----------|-----------|-------------|-------------|
| Lane  | Cells        | guideRNA  | pAKT      | AKT       | pAKT/AKT    | Fold        |
| 1     | CRISPR SVF#1 | control   | 24115.673 | 47316.22  | 0.50967032  | 1           |
| 2     | CRISPR SVF#1 | PTEN #3+4 | 15713.116 | 42532.735 | 0.369435824 | 0.724852536 |
| 3     | CRISPR SVF#3 | control   | 16171.53  | 46697.271 | 0.346305676 | 1           |
| 4     | CRISPR SVF#3 | PTEN #3+4 | 28030.016 | 43814.614 | 0.639741252 | 1.847331118 |

  

| Gel 2 |              |           |         |         |          |        |
|-------|--------------|-----------|---------|---------|----------|--------|
| Lane  | Cells        | guideRNA  | pAKT    | AKT     | pAKT/AKT | Fold   |
| 1     | CRISPR SVF#9 | control   | 18924.9 | 45458.3 | 0.4163   | 1      |
| 2     | CRISPR SVF#9 | PTEN #3+4 | 40323.7 | 41352.1 | 0.9751   | 2.3423 |

  

| Gel 3 |              |           |         |         |          |         |
|-------|--------------|-----------|---------|---------|----------|---------|
| Lane  | Cells        | guideRNA  | pAKT    | AKT     | pAKT/AKT | Fold    |
| 1     | CRISPR SVF#6 | control   | 1557.7  | 34414.0 | 0.0453   | 1       |
| 2     | CRISPR SVF#6 | control   | 1137.2  | 24325.5 | 0.0468   | 1.0329  |
| 3     | CRISPR SVF#6 | PTEN #3   | 18959.9 | 32016.1 | 0.5922   | 13.0837 |
| 4     | CRISPR SVF#6 | PTEN #3+4 | 43735.2 | 37969.8 | 1.1518   | 25.4480 |

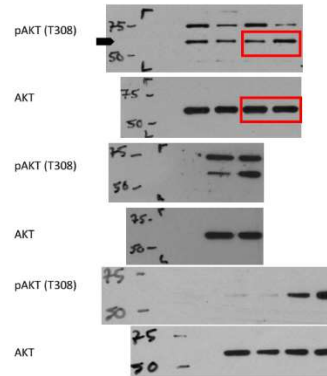

### pS6/ $\alpha$ -Tubulin

| Gel 1 |              |           |                   |         |             |        |
|-------|--------------|-----------|-------------------|---------|-------------|--------|
| Lane  | Cells        | guideRNA  | $\alpha$ -Tubulin | pS6     | pS6/Tubulin | Fold   |
| 1     | CRISPR SVF#1 | control   | 19917.5           | 29887.6 | 1.5006      | 1      |
| 2     | CRISPR SVF#1 | PTEN #3+4 | 20513.1           | 47436.4 | 2.3125      | 1.5411 |
| 3     | CRISPR SVF#3 | control   | 24033.8           | 20507.5 | 0.8533      | 1      |
| 4     | CRISPR SVF#3 | PTEN #3+4 | 22460.1           | 49393.8 | 2.1992      | 2.5773 |

  

| Gel 2 |              |           |                   |         |             |         |
|-------|--------------|-----------|-------------------|---------|-------------|---------|
| Lane  | Cells        | guideRNA  | $\alpha$ -Tubulin | pS6     | pS6/Tubulin | Fold    |
| 1     | CRISPR SVF#9 | control   | 30284.5           | 527.7   | 0.0174      | 1       |
| 2     | CRISPR SVF#9 | PTEN #3+4 | 25771.4           | 19182.4 | 0.7443      | 42.7126 |

  

| Gel 3 |              |           |         |         |           |        |
|-------|--------------|-----------|---------|---------|-----------|--------|
| Lane  | Cells        | guideRNA  | GAPDH   | pS6     | pS6/GAPDH | Fold   |
| 1     | CRISPR SVF#6 | control   | 55297.3 | 8164.4  | 0.1476    | 1      |
| 2     | CRISPR SVF#6 | control   | 41454.0 | 3526.6  | 0.0851    | 0.5762 |
| 3     | CRISPR SVF#6 | PTEN #3   | 35198.0 | 23966.1 | 0.6809    | 4.6117 |
| 4     | CRISPR SVF#6 | PTEN #3+4 | 37901.3 | 49345.4 | 1.3019    | 8.8180 |

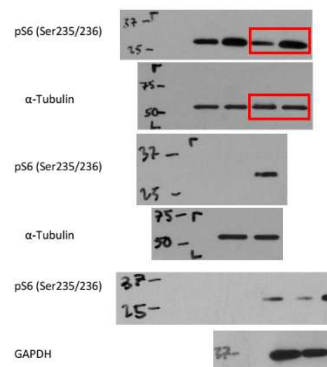

## Constitutive active FOXO1 overexpression in CRISPR SVF

### FOXO1 active/ $\alpha$ -Tubulin

| Gel 1 |                  |           |              |                   |              |               |       |
|-------|------------------|-----------|--------------|-------------------|--------------|---------------|-------|
| Lane  | Cells            | guideRNA  | Plasmid      | $\alpha$ -Tubulin | FOXO1 (FLAG) | FOXO1/Tubulin | Fold  |
| 1     | CRISPR SVF#6 p16 | PTEN #3+4 | control      | 7418.8            | 476.2        | 0.0642        | 1     |
| 2     | CRISPR SVF#6 p16 | PTEN #3+4 | FOXO1 active | 9221.7            | 13958.1      | 1.5136        | 23.58 |
| 3     | CRISPR SVF#6 p17 | PTEN #3+4 | control      | 7703.0            | 246.1        | 0.0320        | 1     |
| 4     | CRISPR SVF#6 p17 | PTEN #3+4 | FOXO1 active | 7416.1            | 7366.7       | 0.9933        | 31.09 |

  

| Gel 2 |                  |           |              |                   |              |               |        |
|-------|------------------|-----------|--------------|-------------------|--------------|---------------|--------|
| Lane  | Cells            | guideRNA  | Plasmid      | $\alpha$ -Tubulin | FOXO1 (FLAG) | FOXO1/Tubulin | Fold   |
| 1     | CRISPR SVF#6 p23 | PTEN #3+4 | control      | 5765.4            | 19.0         | 0.0033        | 1      |
| 2     | CRISPR SVF#6 p23 | PTEN #3+4 | FOXO1 active | 6649.6            | 9061.5       | 1.3627        | 414.60 |

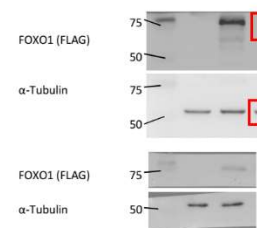

### SREBP1/ $\alpha$ -Tubulin

| Gel 1 |                  |           |              |                   |        |                |      |
|-------|------------------|-----------|--------------|-------------------|--------|----------------|------|
| Lane  | Cells            | guideRNA  | Plasmid      | $\alpha$ -Tubulin | SREBP1 | SREBP1/Tubulin | Fold |
| 1     | CRISPR SVF#6 p16 | PTEN #3+4 | control      | 7418.8            | 5959.8 | 0.8033         | 1    |
| 2     | CRISPR SVF#6 p16 | PTEN #3+4 | FOXO1 active | 9221.7            | 3821.9 | 0.4145         | 0.52 |
| 3     | CRISPR SVF#6 p17 | PTEN #3+4 | control      | 7703.0            | 7921.5 | 1.0284         | 1    |
| 4     | CRISPR SVF#6 p17 | PTEN #3+4 | FOXO1 active | 7416.1            | 5395.6 | 0.7276         | 0.71 |

  

| Gel 2 |                  |           |              |                   |        |                |      |
|-------|------------------|-----------|--------------|-------------------|--------|----------------|------|
| Lane  | Cells            | guideRNA  | Plasmid      | $\alpha$ -Tubulin | SREBP1 | SREBP1/Tubulin | Fold |
| 1     | CRISPR SVF#6 p23 | PTEN #3+4 | control      | 5765.4            | 3939.5 | 0.6833         | 1    |
| 2     | CRISPR SVF#6 p23 | PTEN #3+4 | FOXO1 active | 6649.6            | 1095.8 | 0.1648         | 0.24 |

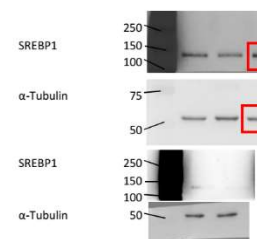

**Figure S5:** Western blots of PTEN CR/control SVF cells: exposed films and densitometric analyses of PTEN (normalized to  $\alpha$ -Tubulin), pAKT (T308) (normalized to total AKT), pS6 (Ser235/236) (normalized to  $\alpha$ -Tubulin), FOXO1 (FLAG antibody, normalized to  $\alpha$ -Tubulin) and SREBP1 (normalized to  $\alpha$ -Tubulin). Western blot images presented in Figures 1(b) and 6(d) were reused (indicated with red boxes).

## PTEN KD

### NAMPT/ $\alpha$ -Tubulin

#### Gel 1

| Lane | cell strain | passage | generation | siRNA   | $\alpha$ -Tubulin | NAMPT   | NAMPT/Tubulin | Fold   |
|------|-------------|---------|------------|---------|-------------------|---------|---------------|--------|
| 1    | SVF#10      | 15      | 17.5       | control | 29685.8           | 11692.5 | 0.3939        | 1      |
| 2    | SVF#10      | 15      | 17.5       | PTEN    | 25892.3           | 25617.6 | 0.9894        | 2.5119 |
| 3    | SVF#10      | 19      | 20.5       | control | 26662.7           | 11961.0 | 0.4486        | 1      |
| 4    | SVF#10      | 19      | 20.5       | PTEN    | 25048.1           | 24268.8 | 0.9689        | 2.1598 |
| 5    | SVF#10      | 21      | 21.5       | control | 21221.5           | 19353.1 | 0.9120        | 1      |
| 6    | SVF#10      | 21      | 21.5       | PTEN    | 24097.4           | 23821.2 | 0.9885        | 1.0840 |

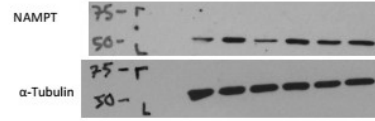

#### Gel 2

| Lane | cell strain | passage | generation | siRNA   | $\alpha$ -Tubulin | NAMPT     | NAMPT/Tubulin | Fold   |
|------|-------------|---------|------------|---------|-------------------|-----------|---------------|--------|
| 1    | SVF#10      | 18      | 27         | control | 25150.572         | 18085.338 | 0.7191        | 1      |
| 2    | SVF#10      | 18      | 27         | PTEN    | 29801.744         | 29915.401 | 1.0038        | 1.3960 |
| 3    | SVF#9       | 25      | 29.5       | control | 28390.179         | 20071.702 | 0.7070        | 1      |
| 4    | SVF#9       | 25      | 29.5       | PTEN    | 31141.229         | 31966.886 | 1.0265        | 1.4519 |
| 5    | SVF#10      | 16      | 24.5       | control | 42169.957         | 33930.229 | 0.8046        | 1      |
| 6    | SVF#10      | 16      | 24.5       | PTEN    | 49634.049         | 50054.726 | 1.0085        | 1.2534 |
| 7    | SVF#10      | 19      | 28         | control | 36816.007         | 37188.907 | 1.0101        | 1      |
| 8    | SVF#10      | 19      | 28         | PTEN    | 33632.057         | 43514.605 | 1.2938        | 1.2809 |

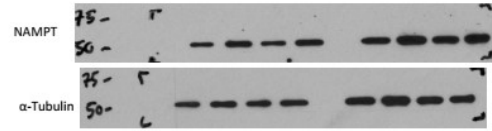

### p21/ $\alpha$ -Tubulin

#### Gel 1

| Lane | cell strain | passage | generation | siRNA   | $\alpha$ -Tubulin | p21       | p21/Tubulin | Fold   |
|------|-------------|---------|------------|---------|-------------------|-----------|-------------|--------|
| 1    | SVF#10      | 18      | 27         | control | 25150.572         | 12232.974 | 0.4864      | 1      |
| 2    | SVF#10      | 18      | 27         | PTEN    | 29801.744         | 5668.246  | 0.1902      | 0.3910 |
| 3    | SVF#9       | 25      | 29.5       | control | 28390.179         | 11907.723 | 0.4194      | 1      |
| 4    | SVF#9       | 25      | 29.5       | PTEN    | 31141.229         | 8778.782  | 0.2819      | 0.6721 |
| 5    | SVF#10      | 16      | 24.5       | control | 42169.957         | 32319.451 | 0.7664      | 1      |
| 6    | SVF#10      | 16      | 24.5       | PTEN    | 49634.049         | 15655.045 | 0.3154      | 0.4115 |
| 7    | SVF#10      | 19      | 28         | control | 36816.007         | 25134.057 | 0.6827      | 1      |
| 8    | SVF#10      | 19      | 28         | PTEN    | 33632.057         | 4063.104  | 0.1208      | 0.1770 |

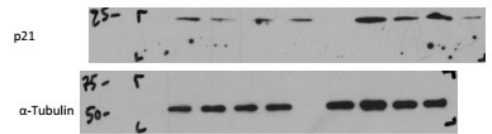

#### Gel 2

| Lane | cell strain | passage | generation | siRNA   | $\alpha$ -Tubulin | p21       | p21/Tubulin | Fold   |
|------|-------------|---------|------------|---------|-------------------|-----------|-------------|--------|
| 1    | SVF#10      | 22      | 31.5       | control | 25002.208         | 16890.459 | 0.6756      | 1      |
| 2    | SVF#10      | 22      | 31.5       | PTEN    | 28004.329         | 7717.246  | 0.2756      | 0.4079 |
| 3    | SVF#8       | 6       | 11.5       | control | 25806.501         | 17323.752 | 0.6713      | 1      |
| 4    | SVF#8       | 6       | 11.5       | PTEN    | 30205.886         | 7867.246  | 0.2605      | 0.3880 |
| 5    | SVF#6       | 19      | 27.5       | control | 23217.016         | 15644.974 | 0.6739      | 1      |
| 6    | SVF#6       | 19      | 27.5       | PTEN    | 24411.501         | 2608.912  | 0.1069      | 0.1586 |
| 7    | SVF#6       | 10      | 16.5       | control | 28875.522         | 4094.447  | 0.1418      | 1      |
| 8    | SVF#6       | 10      | 16.5       | PTEN    | 41495.463         | 97.778    | 0.0024      | 0.0166 |

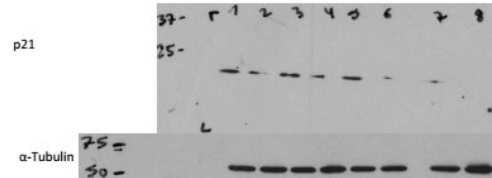

## Longterm culture

#### Gel 1

| Lane | cell strain | passage | generation | days | $\alpha$ -Tubulin | PTEN    | PTEN/Tubulin | NAMPT   | NAMPT/Tubulin | pAkt    | Akt     | pAKT/AKT |
|------|-------------|---------|------------|------|-------------------|---------|--------------|---------|---------------|---------|---------|----------|
| 1    | SVF#6       | 4       | 5.5        | 11   | 21897.7           | 2176.0  | 0.0994       | 10473.0 | 0.4783        | 56901.7 | 1123.8  | 50.6324  |
| 2    | SVF#6       | 8       | 12         | 24   | 36210.7           | 8694.3  | 0.2401       | 4683.2  | 0.1293        | 42782.3 | 28394.1 | 1.5067   |
| 3    | SVF#6       | 5       | 8.5        | 17   | 34287.5           | 2348.0  | 0.0685       | 5311.5  | 0.1549        | 38720.3 | 27248.1 | 1.4210   |
| 4    | SVF#6       | 12      | 17.5       | 35   | 44295.3           | 20148.3 | 0.4549       | 8349.9  | 0.1885        | 7610.3  | 41283.3 | 0.1843   |
| 5    | SVF#6       | 14      | 19.5       | 39   | 45090.0           | 40007.0 | 0.8873       | 1639.7  | 0.0364        | 16317.2 | 38784.3 | 0.4207   |
| 6    | SVF#6       | 16      | 21.5       | 43   | 36260.4           | 29828.0 | 0.8226       | 544.0   | 0.0150        | 26400.0 | 33258.7 | 0.7938   |
| 7    | SVF#6       | 18      | 22.5       | 45   | 22367.2           | 17480.7 | 0.7815       | 408.3   | 0.0183        | 16106.4 | 15828.7 | 1.0175   |
| 8    | SVF#6       | 19      | 23         | 46   | 31162.5           | 22429.2 | 0.7198       | 3111.9  | 0.0999        | 18106.7 | 34120.4 | 0.5307   |
| 9    | SVF#6       | 21      | 26.5       | 53   | 38233.7           | 23050.0 | 0.6029       | 2255.5  | 0.0590        | 5655.3  | 32125.4 | 0.1760   |
| 10   | SVF#6       | 21      | 27         | 54   | 36219.0           | 18207.8 | 0.5027       | 968.6   | 0.0267        | 4665.3  | 36954.7 | 0.1262   |
| 11   | SVF#6       | 22      | 28.5       | 57   | 36973.0           | 27925.5 | 0.7553       | 1786.5  | 0.0483        | 404.3   | 45943.9 | 0.0088   |
| 12   | SVF#6       | 20      | 40.5       | 81   | 33873.7           | 17538.0 | 0.5177       | 391.0   | 0.0115        | 16532.7 | 17372.9 | 0.9516   |

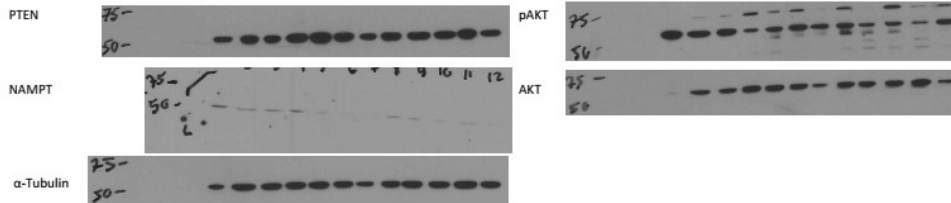

#### Gel 2

| Lane | cell strain | passage | generation | ys in cult | $\alpha$ -Tubulin | PTEN     | PTEN/Tubulin | NAMPT  | NAMPT/Tubulin | pAkt     | Akt      | pAKT/AKT   |
|------|-------------|---------|------------|------------|-------------------|----------|--------------|--------|---------------|----------|----------|------------|
| 1    | SVF#8       | 2       | 2          | 4          | 14337.7           | 12774.77 | 0.890991582  | 14437  | 1.006936259   | 29543.81 | 3388.518 | 8.71879978 |
| 2    | SVF#8       | 3       | 3.5        | 7          | 24164.33          | 52807.38 | 2.185344266  | 6341.5 | 0.262433885   | 41677.32 | 16287.34 | 2.55887825 |
| 3    | SVF#8       | 5       | 8.5        | 17         | 42892.41          | 37488.32 | 0.874008245  | 558.92 | 0.013030744   | 56173.32 | 2402.326 | 23.3828881 |
| 4    | SVF#8       | 11      | 18.5       | 37         | 84696.81          | 49400.24 | 0.583259747  | 198.95 | 0.002348967   | 13984.12 | 20216.09 | 0.69173218 |
| 5    | SVF#8       | 12      | 21         | 42         | 69102.91          | 23498.9  | 0.340056591  | 777.65 | 0.011253477   | 42.536   | 14095.02 | 0.0030178  |
| 6    | SVF#8       | 13      | 22.5       | 45         | 57271.12          | 38048.1  | 0.664350549  | 277.9  | 0.004852341   | 8259.246 | 11969.27 | 0.69003757 |
| 7    | SVF#8       | 14      | 25.5       | 51         | 50289.697         | 68391.49 | 1.359950329  | 717.75 | 0.014272287   | 7757.368 | 32665.81 | 0.23747668 |

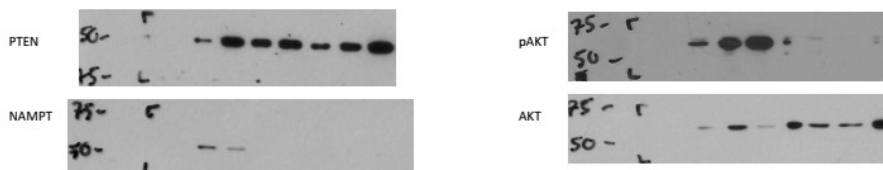

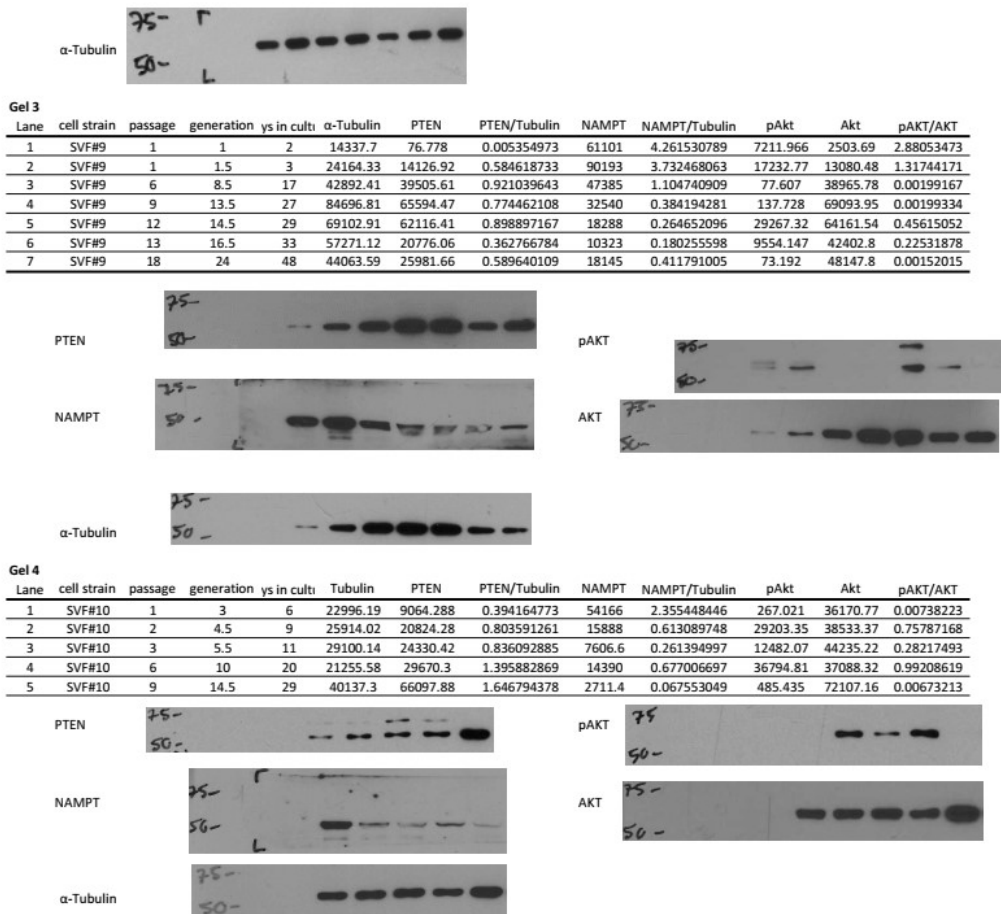

**Figure S6:** Western blots of four SVF cell long term cultures: exposed films and densitometric analyses of PTEN (normalized to  $\alpha$ -Tubulin), pAKT (T308) (normalized to total AKT) and pS6 (Ser235/236) (normalized to  $\alpha$ -Tubulin).

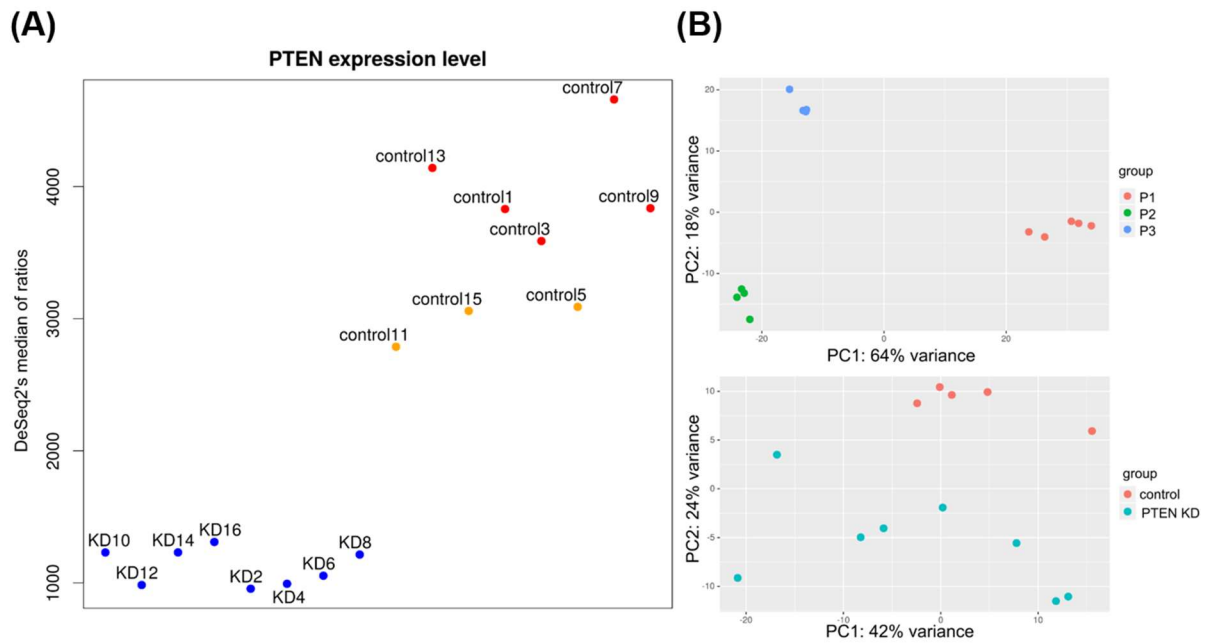

**Figure S7:** (A) Normalized read counts mapping to *PTEN* mRNA in the investigated samples. (B) PCA of samples clearly cluster according patients (upper panel), after removing the variance caused by the individual cell donors the second principal component (PC2) segregates the samples into control vs. PTEN (lower panel).

### Supporting information tables:

Lists of differentially expressed genes (Supporting information Tables S1-3) are available separately.

**Table S4.** SVF cell cultures.

| Name    | Sex    | Age at resection | Origin       |
|---------|--------|------------------|--------------|
| SVF#1   | female | 31               | visceral     |
| SVF#3   | female | 30               | visceral     |
| SVF#5   | female | 33               | visceral     |
| SVF#6   | male   | 27               | visceral     |
| SVF#8   | male   | 37               | visceral     |
| SVF#9   | female | 32               | visceral     |
| SVF#10  | female | 29               | visceral     |
| SVF#11S | male   | 18               | subcutaneous |
| SVF#12S | male   | 24               | subcutaneous |
| SVF#14S | female | 28               | subcutaneous |



**Table S5.** Antibodies used for flow cytometry.

| Marker | Fluorophore | Distributor | Clone       | Cat. no     |
|--------|-------------|-------------|-------------|-------------|
| MSCA1  | PE          | Miltenyi    | W8B2        | 130-093-587 |
| CD34   | FITC        | Miltenyi    | AC136       | 130-113-178 |
| CD14   | PeVio770    | Miltenyi    | Tük4        | 130-113-149 |
| CD271  | APC         | Miltenyi    | ME20.4-1-H4 | 130-113-418 |
| CD8    | PerCP       | BD Horizon  | SK1         | 345774      |
| CD31   | V450        | BD Horizon  | WM59        | 561653      |
| CD45   | BV510       | BioLegend   | HI30        | 304036      |

**Table S6.** Flow cytometry analysis of cell surface markers.

| cells   | passage | generation | single cells | viable cells | CD8+  | CD14+ | CD31+ | CD34+  | CD45+ | CD271+ | MSCA1+ |
|---------|---------|------------|--------------|--------------|-------|-------|-------|--------|-------|--------|--------|
| LipPD1  | 6       | 8          | 97%          | 77.60%       | none  | none  | none  | none   | none  | 4.70%  | 4.74%  |
| LipPD1  | 28      | 34         | 93.60%       | 66.70%       | none  | 6%    | none  | 3.62%  | none  | 3.86%  | 1.51%  |
| SVF#1   | 6       | 19         | 95.30%       | 57.00%       | none  | 2.56% | none  | 18.60% | none  | 3.67%  | none   |
| SVF#1   | 12      | 17.5       | 93.70%       | 51.90%       | none  | 2.76% | none  | 22.00% | none  | 1.58%  | 3.00%  |
| SVF#1   | 22      | 35.5       | 99.10%       | 71.20%       | none  | none  | none  | 29.00% | none  | none   | 1.63%  |
| SVF#5   | 0       | 0          | 98.90%       | 23.00%       | none  | 9.10% | 3.04% | 58.70% | 6.18% | 15.80% | 5.96%  |
| SVF#5   | 11      | 25.5       | 96.50%       | 79.90%       | none  | none  | none  | 2%     | none  | none   | none   |
| SVF#6   | 0       | 1.5        | 99.60%       | 8.04%        | none  | 2.98% | 2%    | none   | none  | 19%    | 19%    |
| SVF#6   | 16      | 19         | 96.20%       | 79.30%       | none  | none  | none  | 12.90% | none  | none   | 4.46%  |
| SVF#6   | 23      | 31         | 97.10%       | 74.80%       | none  | none  | none  | 38.60% | none  | none   | 2.44%  |
| SVF#8   | 0       | 1          | 99.20%       | 53.10%       | 1.59% | 2.82% | 3.53% | 74.40% | 2.67% | 55.60% | 7.29%  |
| SVF#8   | 11      | 23.5       | 92%          | 65.50%       | none  | none  | none  | 17%    | none  | none   | none   |
| SVF#9   | 0       | 1          | 99%          | 33.90%       | 5.30% | 9.44% | 2.72% | 56.70% | 4.50% | 27.20% | 5.17%  |
| SVF#9   | 4       | 6          | 95.50%       | 74.50%       | none  | none  | none  | none   | none  | 23.20% | 11.60% |
| SVF#9   | 14      | 20         | 97.30%       | 82.60%       | none  | none  | none  | 44.70% | none  | none   | 1.11%  |
| SVF#10  | 15      | 20.5       | 96.90%       | 89.20%       | none  | none  | none  | 5.94%  | none  | 2.27%  | 1.54%  |
| SVF#10  | 15      | 24         | 94.50%       | 77.90%       | none  | none  | none  | 15%    | none  | none   | 20.20% |
| SVF#10  | 23      | 27         | 90.40%       | 79%          | none  | none  | none  | none   | none  | none   | none   |
| SVF#11S | 22      | 29         | 95.30%       | 65.40%       | none  | none  | none  | 6.18%  | none  | 15.60% | none   |
| SVF#12S | 18      | 26.5       | 96%          | 78%          | none  | none  | none  | 12.80% | none  | none   | none   |
| SVF#14S | 8       | 12.5       | 96.40%       | 87%          | none  | none  | none  | 9.53%  | none  | 1.72%  | none   |
| SVF #3  | 0       | 3.5        | 99%          | 26%          | none  | none  | none  | 5.14%  | none  | 1.62%  | 2.75%  |

**Table S7.** crRNAs used for CRISPR/Cas9 *PTEN* knockout.

| # | Design ID           | crRNA Sequence       | PAM | Strand |
|---|---------------------|----------------------|-----|--------|
| 1 | Hs.Cas9.PTEN.1.AC   | TTATCCAAACATTATTGCTA | TGG | +      |
| 2 | Hs.Cas9.PTEN.1.AF   | TATCCAAACATTATTGCTAT | GGG | +      |
| 3 | CD.Cas9.VCTN3398.AH | ATATCTGAGTACTTTAGTTA | AGG | -      |
| 4 | CD.Cas9.VCTN3398.BE | TTTCCTGCAGAAAGACTTGA | AGG | +      |

**Table S8.** Antibodies used for Western blot (Wb) and immunofluorescence staining (IF).

| <b>Primary antibody</b>                                             | <b>Dilution</b>           | <b>Distributor</b> | <b>Cat. no</b> |
|---------------------------------------------------------------------|---------------------------|--------------------|----------------|
| PTEN ( 138G6) Rabbit map                                            | 1:1000 TBS-T 5%BSA (Wb)   | CST                | #9559          |
| AKT antibody Rabbit polyclonal Ab                                   | 1:1000 TBS-T 5%BSA (Wb)   | CST                | #9272          |
| Phospho-AKT (Thr308) (224F9) Rabbit mAb                             | 1:1000 TBS-T 5%BSA (Wb)   | CST                | #4056          |
| Phospho-S6 Ribosomal protein (Ser235/236) (D57.2.2E) XP® Rabbit mAb | 1:1000 TBS-T 5%BSA (Wb)   | CST                | #4858          |
| mAb anti -NAMPT Antibody                                            | 1:1000 TBS-T 5%BSA (Wb)   | Novus Biologicals  | #NBP1-96585    |
| P21 Waf 1/Cip1 D(S60)                                               | 1:1000 TBS-T 5%BSA (Wb)   | CST                | #2496          |
| alpha Tublin (11H10) Rabbit mAb                                     | 1:2000 TBS-T 5%BSA (Wb)   | CST                | #2125          |
| Phospho-FoxO1 (Ser256) Antibody                                     | 1:1000 TBS-T 5%BSA (Wb)   | CST                | #9461          |
| SREBP-1 polyclonal antibody                                         | 1:1000 TBS-T 5% milk (Wb) | Santa Cruz         | sc-8984        |
| ANTI-FLAG Rabbit antibody                                           | 1:1000 TBS-T 5%BSA (Wb)   | Sigma              | F7425          |
| KI-67 (MIB-1) Mouse mAb                                             | 1:200 IF-buffer (IF)      | Dako               | P0447          |
| <b>Secondary antibody</b>                                           | <b>Dilution</b>           | <b>Supplier</b>    | <b>Cat. no</b> |
| Polyclonal goat anti-rabbit immunoglobulin/HRP                      | 1:2000 TBS-T 5% milk (Wb) | Dako               | P0447          |
| Polyclonal goat anti-mouse immunoglobulin/HRP                       | 1:2000 TBS-T 5% milk (Wb) | Dako               | P0448          |
| Alexa Fluor 488 goat anti-mouse IgG H+L                             | 1:1000 IF-buffer (IF)     | Invitrogen         | A11001         |

**Table S9.** Primers used for RT-qPCR.

| <b>Gene</b>            | <b>Forward</b>                  | <b>Reverse</b>                | <b>Probe</b>                        |
|------------------------|---------------------------------|-------------------------------|-------------------------------------|
| <i>HPRT</i>            | GGCAGTATAATCCAAAGATGGT<br>CAA   | GTCTGGCTTATATCCAACACTT<br>CGT | CAAGCTTGCTGGTGAAAAGGA<br>CCCC       |
| <i>TBP</i>             | TTGTAAACTTGACCTAAAGACC<br>ATTGC | TTCGTGGCTCTCTTATCCTCAT<br>G   | AACGCCGAATATAATCCCAAGC<br>GGTTG     |
| <i>PTEN</i>            | TGTAAAGCTGGAAAGGGACGA           | GGAATAGTTACTCCCTTTTTGT<br>CTC |                                     |
| <i>ADIPOQ</i>          | GGCCGTGATGGCAGAGAT              | CCTTCAGCCCCGGGTACT            | CGATGTCTCCCTTAGGACCAAT<br>AAGACCTGG |
| <i>FABP4</i>           | GCTTTTGTAGGTACCTGGAAAC<br>TTG   | ACACTGATGATCATGTTAGGTT<br>TGG | CCTGGTGGCAAAGCCCCACTCC<br>TCAT      |
| <i>FASN</i>            | GGCAAATTCGACCTTTCTCAGA          | GGACCCCGTGGAATGTCA            | CACCCGCTCGGCATGGCTATC<br>TT         |
| <i>CDKN1A</i><br>(p21) | CGAAGTCAGTTCCTTGTGGAG           | CATGGGTTCTGACGGACAT           |                                     |
| <i>CDKN2A</i><br>(p16) | CTTCGGCTGACTGGCTGG              | TCATCATGACCTGGATCGGC          |                                     |
| <i>CDKN2B</i><br>(p15) | AGGCGCGCGATCCAG                 | GGTGAGAGTGGCAGGGTCT           |                                     |
| <i>HIPK2</i>           | GCTCAAGATGGCAGATTCCG            | ACTTGCACATGTGAGGCCATA         |                                     |
| <i>FOXO1</i>           | CCTACGCCGACCTCATCAC             | AATTGAATTCTCCAGCCCGC          |                                     |
| <i>RNF144B</i>         | TGCCTGAAACAGTACATGCAG           | ACCAAACAGGCAATCTCAGC          |                                     |
| <i>SREBF-1</i>         | ACCGACATCGAAGGTGAAGT            | CAGGGAAGTCACTGTCTTGGT         |                                     |
